# MIND TO MIND

Creative writing that explores the abstract side of our profession and our lives

*Stephen T. Harvey, M.D., Editor*

## Adverbs of the Heart

Teffy Wrightson

Tucked in a pocket  
torn into flesh  
surgically

a box is conducting  
my life's pace  
rhythmically

I could hack into that  
my son says  
hypothetically

speed it up, slow it down  
even stop it  
whimsically

lucky you love me  
then, I say  
optimistically

This poem is one of the finalists of ANESTHESIOLOGY's 2018 annual creative writing competition, The Letheon.

teffy208@gmail.com

Permission to reprint granted to the American Society of Anesthesiologists, Inc., and Wolters Kluwer Health, Inc., by copyright author/owner. Anesthesiology 2019; 130:349
